# Supplementary material for: Derivatizing l-histidine to develop a novel additive for a polyol-based biolubricant
Source: Royal Society of Chemistry journal article supplement (doi:10.1039/c5nj00467e), 2015-01-01
Supplement: c5nj00467e1.pdf [file c5nj00467e1.pdf]

## Supplementary Information

### **Derivatizing L-histidine to develop novel additive for polyol based biolube**

**Raj K. Singh,<sup>a,\*</sup> Shubham Pandey,<sup>a</sup> Rakesh C. Saxena,<sup>a</sup> Gananath D. Thakre,<sup>b</sup> Neeraj Atray,<sup>c</sup> Siddharth S. Ray<sup>a</sup>**

*<sup>a</sup>Chemical Sciences Division, CSIR-Indian Institute of Petroleum, Dehradun-248 005, India; Tel: +91-135-2525708 (O); Fax: +91-135-2660202; Email: [rksingh@iip.res.in](mailto:rksingh@iip.res.in)*

*<sup>b</sup>Tribology Division, CSIR-Indian Institute of Petroleum, Dehradun-248 005, India*

*<sup>c</sup>Bio Fuels Division, CSIR-Indian Institute of Petroleum, Dehradun-248 005, India*

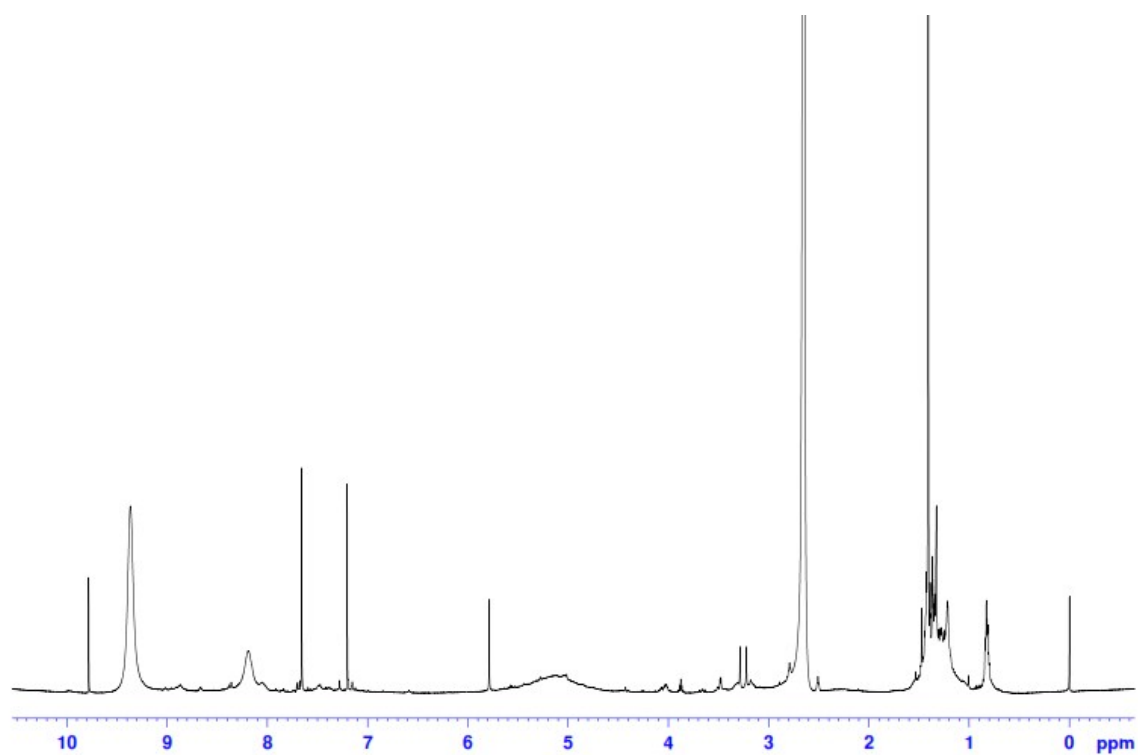

**Fig. S1:**  $^1\text{H}$  NMR of *HSE-B* in  $\text{CDCl}_3$ .

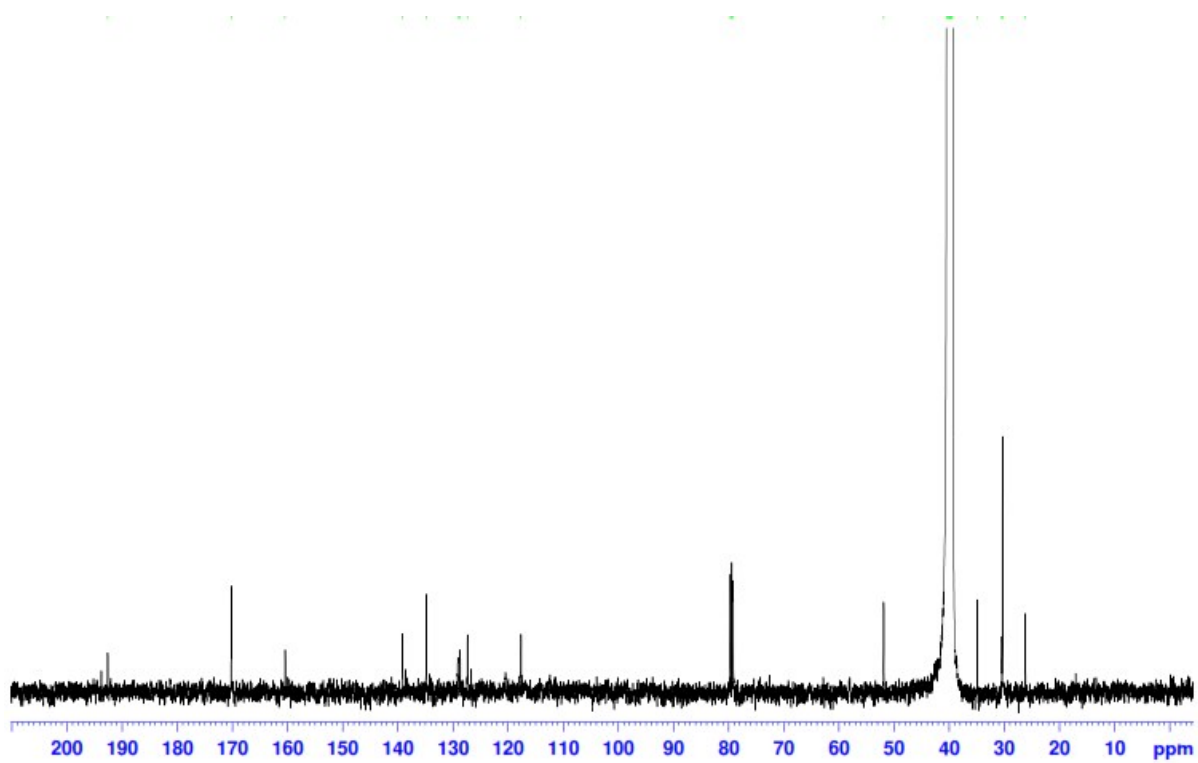

**Fig. S2:**  $^{13}\text{C}$  NMR of *HSE-A* in  $\text{d}^6\text{-DMSO}$ .

## GC/MS

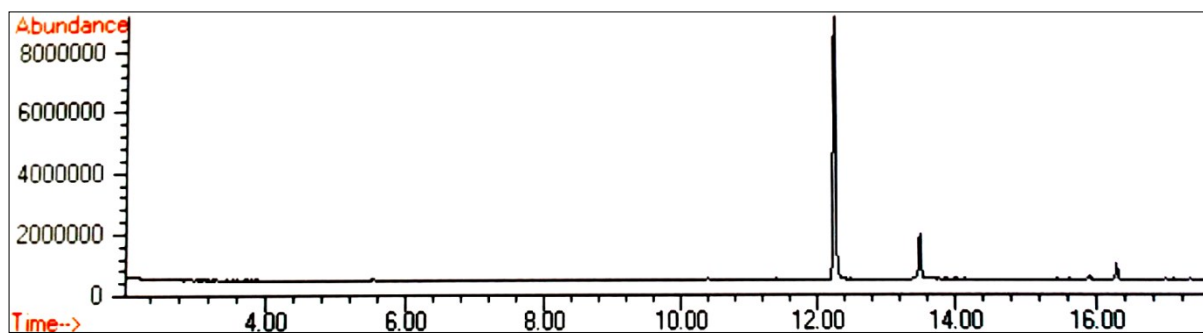

Fig. S3: GC/MS chromatogram of the sample *HSE-B*.

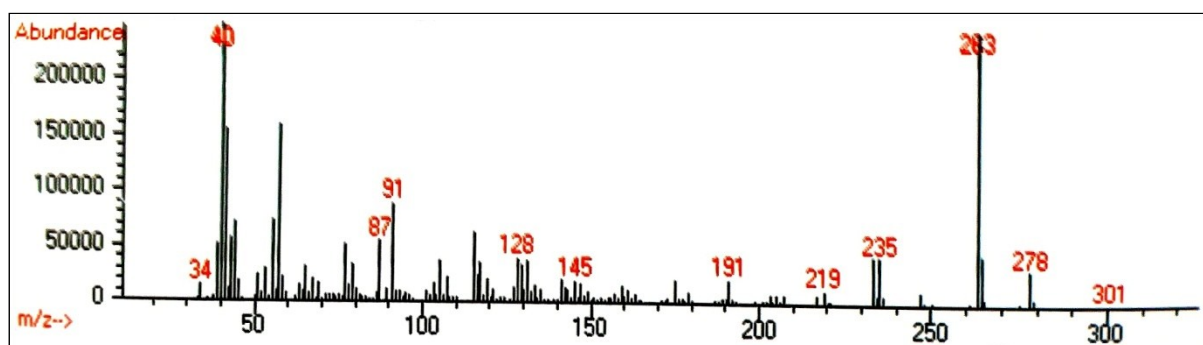

Fig. S4: Mass spectrum of the major component at 12.259 min (analyzed as *HSE-B*).

**Table S1.** The major peak assignment in GC/MS Spectrum of *HSE-B*.

| <b>m/z</b> | <b>Fragments</b>                                                                     |
|------------|--------------------------------------------------------------------------------------|
| 40         |     |
| 57         |     |
| 87         |     |
| 91         |     |
| 128        |     |
| 145        |     |
| 219        |    |
| 235        |   |
| 263        |  |
| 278        |  |
